# Supplementary material
Source: Research Square preprint supplement (doi:10.21203/rs.3.rs-12132/v4)
Supplement: Supplementary file 1 [file c2517460bf390610a7d78e75.docx]

Additional file 1

Questionnaire for oral health related knowledge and behavior among eight to ten year old school children who attending to Basic Education Middle School (2015 -1016-2017 academic year in Magway Township)

This questionnaire is only for research. The result will not be linked to individual student and will be kept confidential. Name of the student is no need to describe. It is requested to answer all questions. Thank you for your participation. Please mark (√) in front of the most appropriate correct answer.

ID number |__| |__| |__| Date __/__/__

Name of school --------------------------------

Part (A) Demographic characteristics of the school children

(1) Age (in completed year)

􀂅8 year

􀂅9 year

􀂅10 year

(2) Gender

􀂅Boy

􀂅Girl

Part (B) Knowledge questions on oral health

(3) The main cause of tooth decay is

􀂅Eating lots of meat

􀂅Acid from dental plaque and food debris

􀂅Destruction of tooth substance by insect like germs

􀂅Don’t know

(4) The main cause of gum diseases is

􀂅Biting on hard foods

􀂅Excessive eating of sweet foods

􀂅Plaque accumulated on teeth/gums due to neglect of oral hygiene

􀂅Don’t know

(5) Dental caries and periodontal diseases can be prevented by one of the following means

􀂅Taking vitamin tablets

􀂅Regular tooth brushing and good oral hygiene practices

􀂅Can’t be prevented, because they are hereditary

􀂅Don’t know

(6) Foods that can cause dental caries

􀂅Fresh fruits & vegetables

􀂅Sweet sticky foods and soft drinks

􀂅Meat/fish

􀂅Don’t know

(7) Excessive chewing of betel quid/smoking/drinking alcohol can destroy oral health, ultimately can develop oral cancer

􀂅Yes

􀂅No

􀂅Don’t know

Part (C) Behavioral questions on oral health

(8) How many times did you brush your teeth, yesterday?

􀂅I miss to brush

􀂅Once

􀂅Twice

􀂅More than two times

(9) At what time of the day, do you brush your teeth?

􀂅Morning, before breakfast

􀂅After breakfast and before going to bed

􀂅Before breakfast and before going to bed

􀂅During bath

􀂅Others, please specify _________________________________________

(10) What do you use to brush your teeth?

􀂅Salt with fingers

􀂅Ash/charcoal with fingers

􀂅Toothbrush and tooth paste

􀂅Others, please specify _________________________________________

(11) What will you do if food debris stuck between your teeth?

􀂅Use toothpick

􀂅Use dental floss

􀂅I will leave it as it is

􀂅Others, please specify __________________________________________

| (12) In which pattern do the children brush him/her teeth? | | Do | Don’t |
| --- | --- | --- | --- |
|  | 􀂅 Horizontally for every teeth |  |  |
|  | 􀂅 Vertically from the gums toward tooth surfaces, and horizontally on grinding surfaces |  |  |
|  | 􀂅 Various directions, according to the ease of manipulation |  |  |
|  | 􀂅 Other (specify) ---------------------- |  |  |
